# Supplementary material for: Zr-MOF composites with zipped and unzipped carbon nanotubes for high-performance electrochemical supercapacitors
Source: Royal Society of Chemistry journal article supplement (doi:10.1039/d4nr03926b), 2024-11-20
Supplement: d4nr03926b1.pdf [file d4nr03926b1.pdf]

## Supporting Information

### Zr-MOFs Composites with Zipped and Unzipped Carbon Nanotubes for High-Performance Electrochemical Supercapacitors

Asmaa R. Heiba<sup>a, 1</sup>, M.O. Abdel-Salam<sup>a,b,c, 1</sup>, Taeho Yoon<sup>\*d</sup>, and Ehab El Sawy<sup>\*a</sup>

<sup>a</sup>Department of Chemistry, School of Science and Engineering, the American University in Cairo, Cairo, Egypt 11835

<sup>b</sup>Analysis and Evaluation Department, Egyptian Petroleum Research Institute (EPRI), 1 Ahmed El Zomor St., Nasr City, Cairo, 11727, Egypt

<sup>c</sup>Central Analytical Laboratories, Nanotechnology Research, Egyptian Petroleum Research Institute (EPRI), 1 Ahmed El Zomor St., Nasr City, Cairo, 11727, Egypt

<sup>d</sup>Department of Chemical Engineering, Kyung Hee University, Yongin-si, Gyeonggi-do, 17104 Republic of Korea

#### \*Corresponding Authors:

Ehab El Sawy (e-mail: [ehab.elsawy@aucegypt.edu](mailto:ehab.elsawy@aucegypt.edu)) and Taeho Yoon (email: [tyoon@khu.ac.kr](mailto:tyoon@khu.ac.kr))

<sup>1</sup>Authors contributed equally to the work

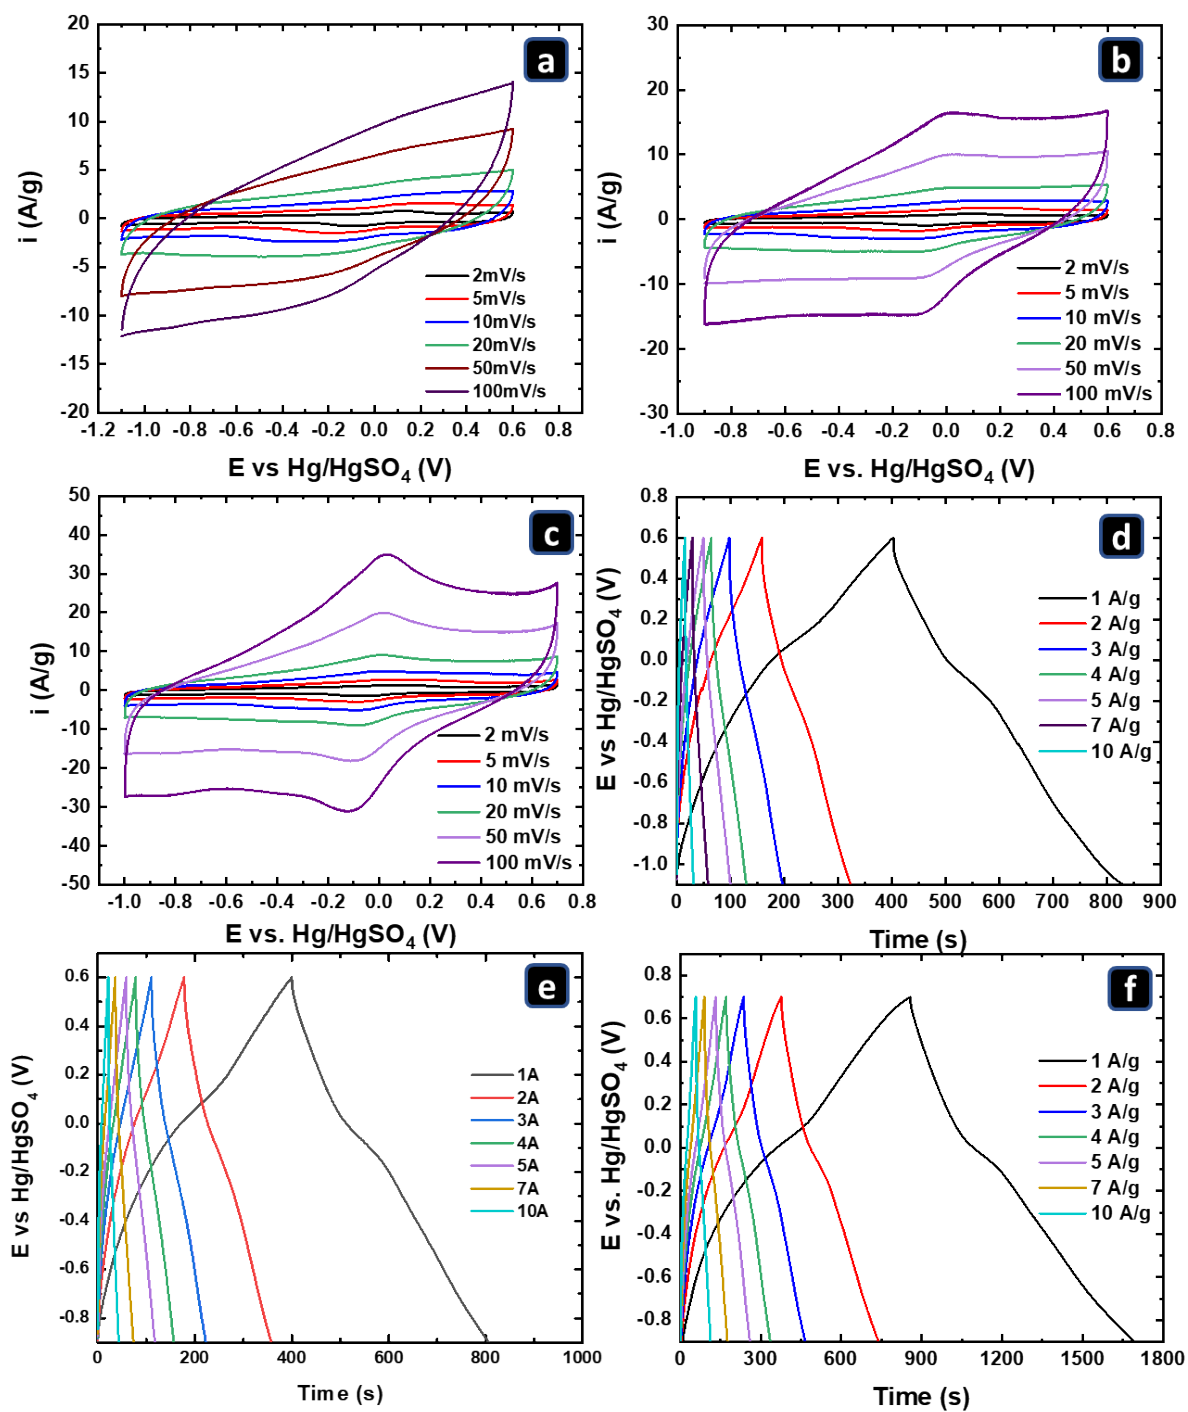

**Fig. S1:** CV (2-100 mV/s) and GCD (1-10 A/g) of (a, d) Zr-MOFs, (b, e) FCNTs, and (c, f) GONRs, in 1 M H<sub>2</sub>SO<sub>4</sub> at RT, respectively.

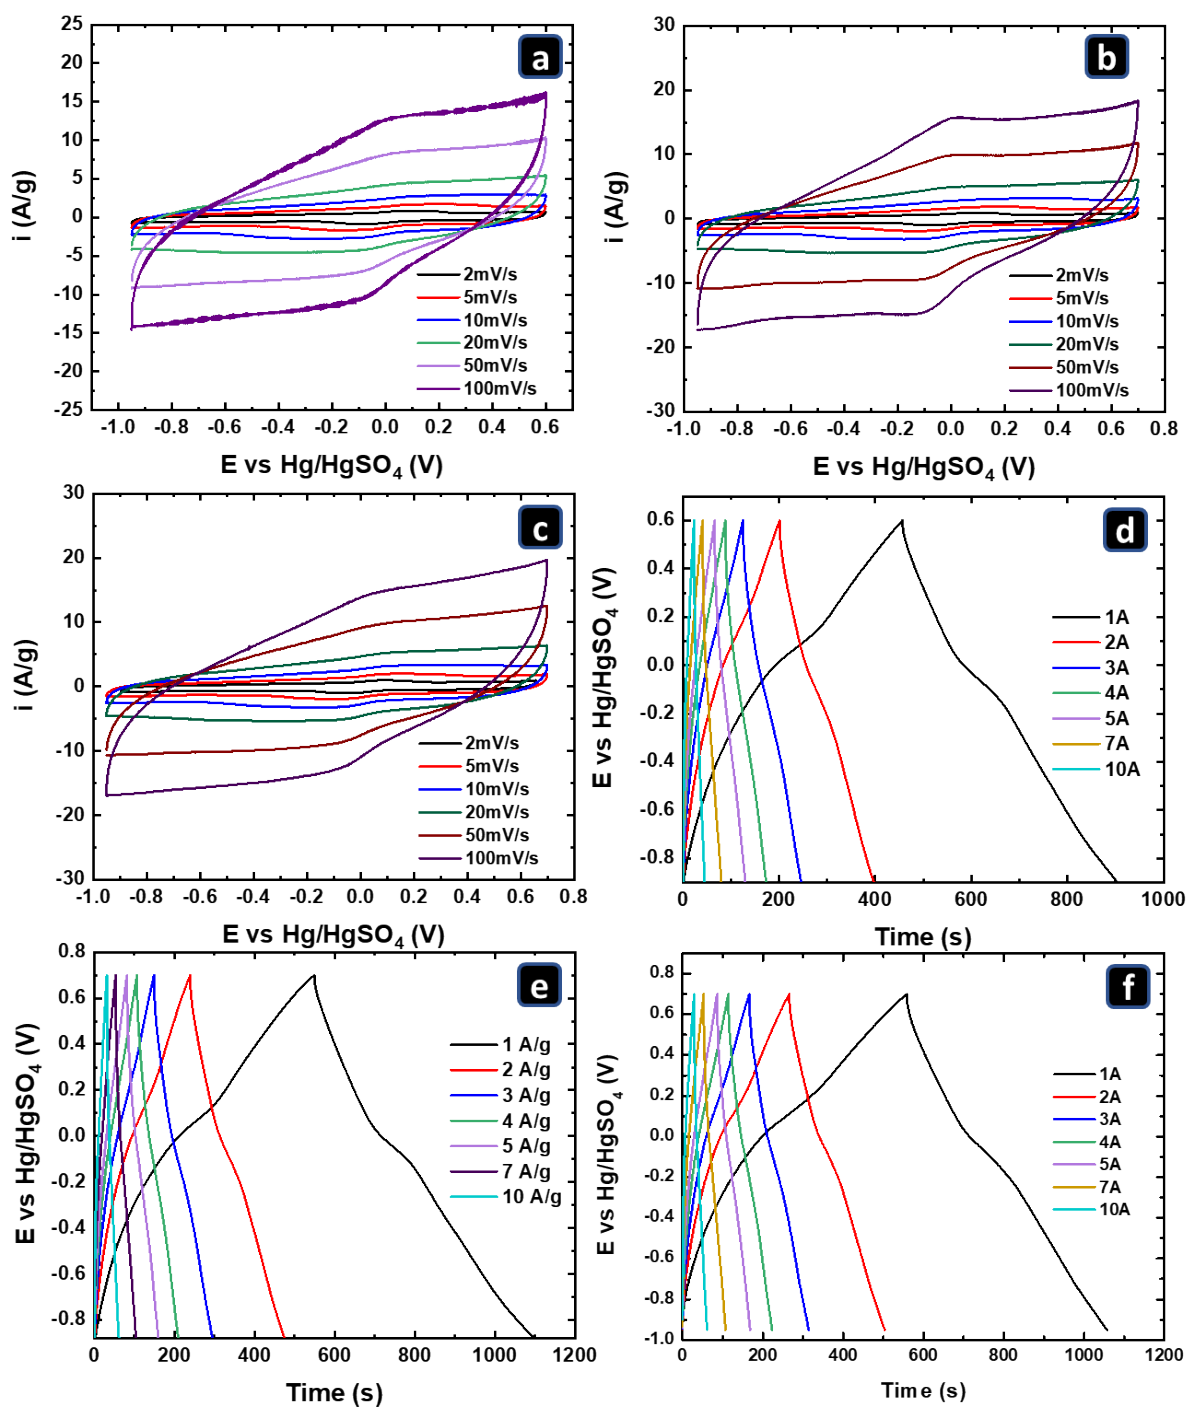

**Fig. S2:** CV (2-100 mV/s) and GCD (1-10 A/g) responses of (a, d) Zr-MOFs/FCNTs (1:1), (b, e) Zr-MOFs/FCNTs (1:2), (c, f) Zr-MOFs/FCNTs (1:4), in 1 M  $\text{H}_2\text{SO}_4$  at RT, respectively.

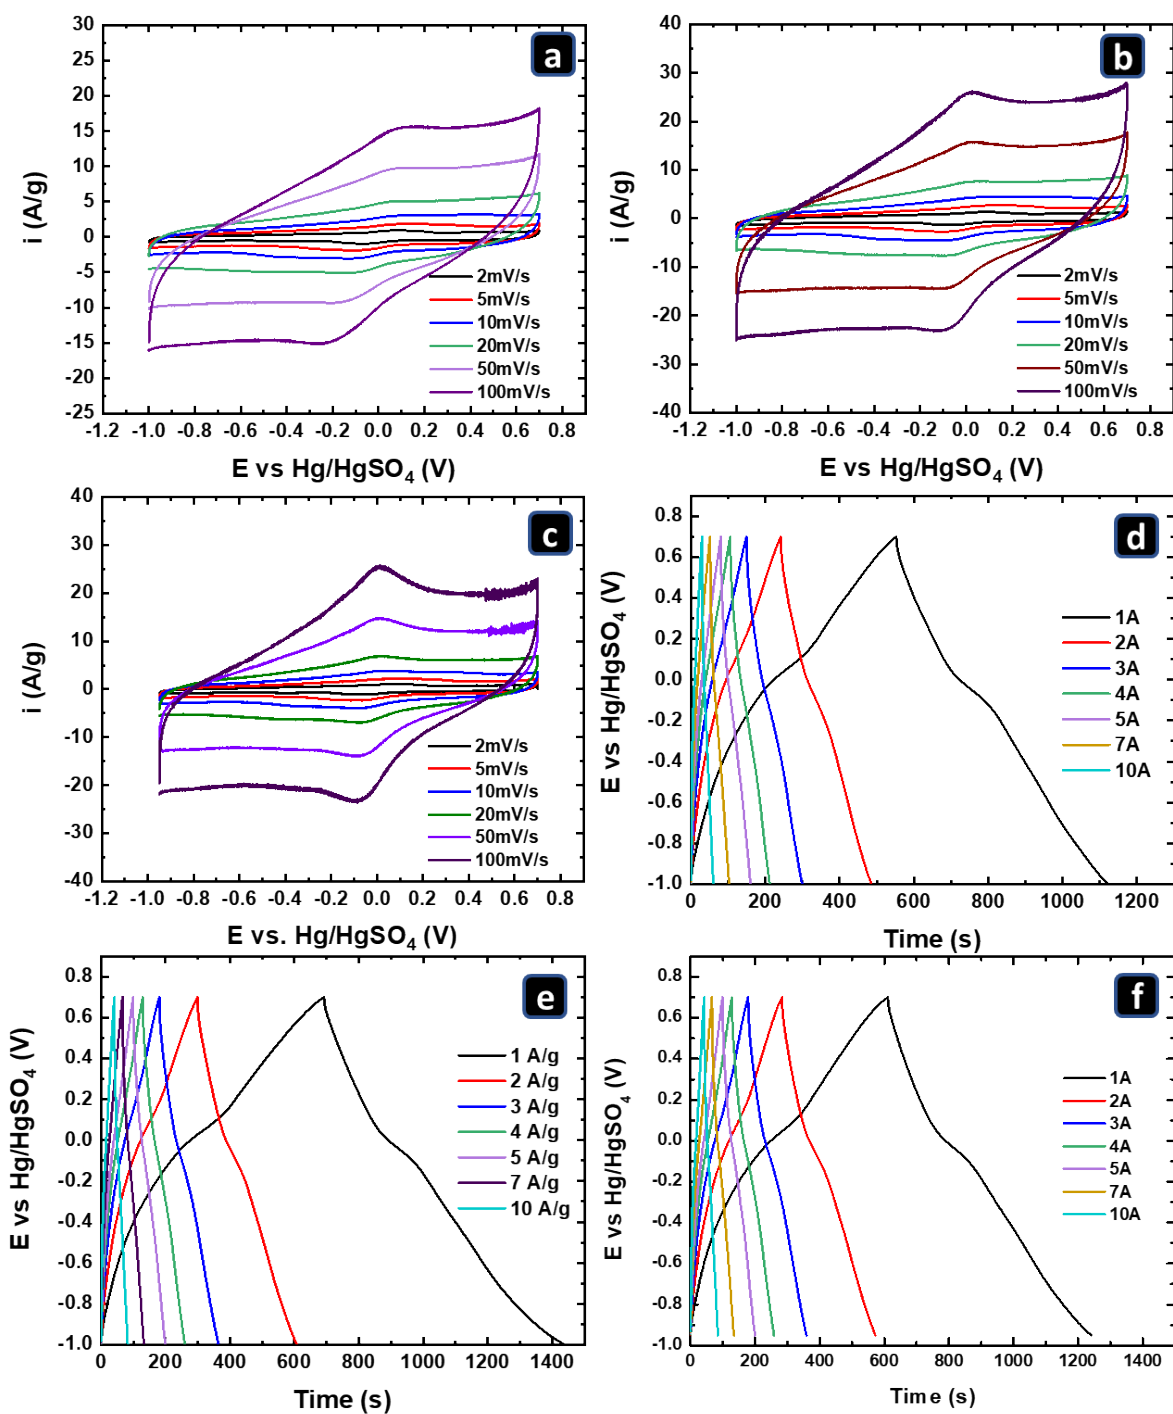

**Fig. S3:** CV (2-100 mV/s) and GCD (1-10 A/g) responses of (a, d) Zr-MOFs/ GONRs (1:1), (b, e) Zr-MOFs/ GONRs (1:2), (c, f) Zr-MOFs/ GONRs (1:4), in 1 M  $\text{H}_2\text{SO}_4$  at RT, respectively.

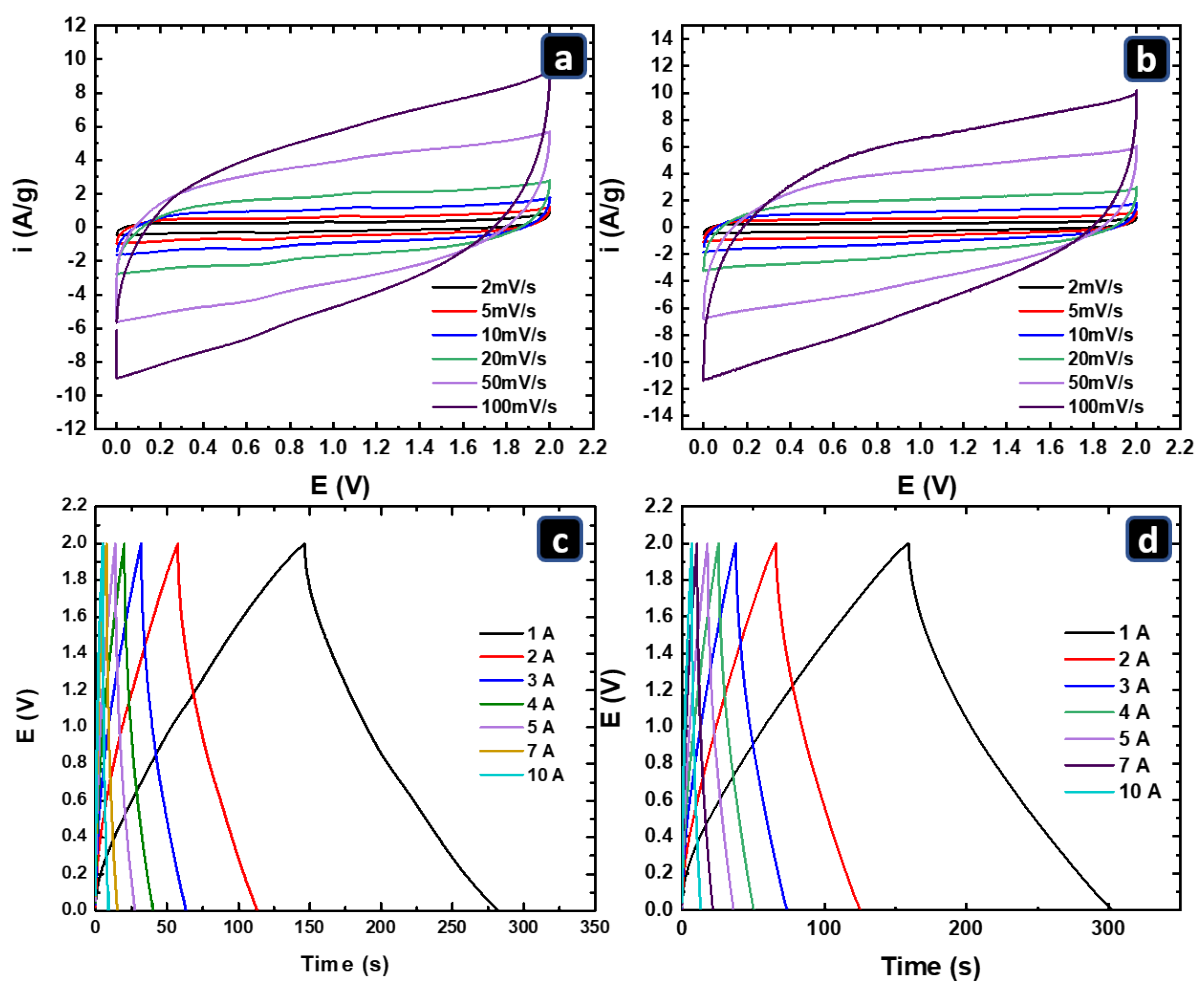

**Fig. S4:** CV (2-100 mV/s) and GCD (1-10 A/g) for the (a, c) Zr-MOFs/GONRs//GONRs, (b, d) Zr-MOFs/FCNTs//GONRs asymmetric two-electrode devices in 1 M  $\text{H}_2\text{SO}_4$  at RT, respectively.
